# Supplementary material for: Media Framing of the Belt and Road Initiative: A Comparative Analysis of India and Nepal
Source: Research Square preprint supplement (doi:10.21203/rs.3.rs-8396040/v1), 2026-02-03
Supplement: Supplementary file 1 [file d44fc843ec47b96cb9a74572.docx]

**Formulas:**

1. **Reliability (Cronbach Alpha)**:
   - Formula:
   - Used for testing internal consistency of the scales (Economic and Risk Indexes).
2. **Descriptive Statistics**:
   - Formulae for calculating mean, standard deviation, minimum, and maximum values.
   - ​
   - ​
3. **Correlation Matrix**:
   - Formula for correlation:
   - Used to examine the relationships between various variables like Economic Index, Risk Index, etc.
4. **Regression Model**:
   - The regression equation is used to predict the dependent variable (Support for BRI) from several independent variables (Economic Perception, Risk Perception, Geopolitical Concern, Trust, and Media Influence).
   - The model:

**Statistical Code:**

1. **SPSS Code**:

**Import Cleaned Dataset**:

GET DATA /TYPE=XLSX /FILE='Cleaned_Analysis_Data_480.xlsx' /SHEET=name 'Sheet1' /READNAMES=ON.

**Reliability Analysis (Cronbach Alpha)**:

RELIABILITY /VARIABLES=Econ_Benefit Infra_Dev /SCALE('Economic_Index') ALL /MODEL=ALPHA.

RELIABILITY /VARIABLES=Debt_Risk Sovereignty /SCALE('Risk_Index') ALL /MODEL=ALPHA.

**Descriptive Statistics**:

DESCRIPTIVES VARIABLES=Econ_Index Risk_Index Geo_Index Trust_Index Support_BRI Policy_Influence

/STATISTICS=MEAN STDDEV MIN MAX.

**Independent Samples T-Test** (for comparing India vs Nepal):

T-TEST GROUPS=Country(India Nepal) /VARIABLES=Econ_Index Risk_Index Trust_Index Support_BRI Policy_Influence.

**Correlation Matrix**:

CORRELATIONS /VARIABLES=Econ_Index Risk_Index Geo_Index Trust_Index Support_BRI Policy_Influence

/PRINT=TWOTAIL NOSIG.

**Regression Model**:

REGRESSION /DEPENDENT Support_BRI /METHOD=ENTER Econ_Index Risk_Index Geo_Index Trust_Index Policy_Influence.

1. **SmartPLS Code**:

**Measurement Model**:
Constructed as follows for the variables (Economic_Perception, Risk_Perception, etc.):

| **Construct** | **Indicators** |
| --- | --- |
| Economic_Perception | Econ_Benefit, Infra_Dev |
| Risk_Perception | Debt_Risk, Sovereignty |
| Geopolitical_Concern | Geo_Security |
| Trust_in_China | Trust_China |
| Media_Influence | Opinion_Change, Policy_Influence |
| Support_BRI | Support_BRI |

**Structural Paths**:

Economic_Perception → Support_BRI

Risk_Perception → Support_BRI

Geopolitical_Concern → Support_BRI

Trust_in_China → Support_BRI

Media_Influence → Support_BRI

**Bootstrapping Settings**:

Subsamples: 5000

Confidence Level: 95%

Test Type: Two-tailed

Significance Level: 0.05

**Model Fit & Validity Checks**:

Cronbach Alpha: > 0.70

Composite Reliability: > 0.70

Average Variance Extracted (AVE): > 0.50

Heterotrait-Monotrait Ratio (HTMT): < 0.85

Report R², f², Q² values
