# Supplementary material for: Media Framing of the Belt and Road Initiative: A Comparative Analysis of India and Nepal
Source: Research Square preprint supplement (doi:10.21203/rs.3.rs-8396040/v1), 2026-02-03
Supplement: Supplementary file 2 [file e36594cf7a466330f680a0af.xlsx]

## Sheet: Sheet1
1. Survey Questionnaire Variables
Variable	Definition	Coding Scheme	Scale
Econ_Benefit	Perception that the BRI improves national economic growth	1=Strongly Disagree … 5=Strongly Agree	Likert (1–5)
Infra_Dev	Perceived improvement in infrastructure due to BRI	1=Strongly Disagree … 5=Strongly Agree	Likert
Debt_Risk	Perceived risk of debt dependency from BRI	1=Strongly Disagree … 5=Strongly Agree	Likert
Sovereignty	Perceived threat to national sovereignty from BRI	1=Strongly Disagree … 5=Strongly Agree	Likert
Geo_Security	Perceived geopolitical/security implications of BRI	1=Strongly Disagree … 5=Strongly Agree	Likert
Trust_China	Level of trust in China’s intentions under BRI	1=Very Low … 5=Very High	Likert
Support_BRI	Level of public support for joining BRI	1=Strongly Oppose … 5=Strongly Support	Likert
Opinion_Change	Extent to which media coverage changes public opinion	1=None … 5=Very High	Likert
Policy_Influence	Perceived influence of media on government BRI policy	1=None … 5=Very High	Likert
2. Demographic Variables
Variable	Definition	Coding
Country	Respondent’s country	1=India, 2=Nepal
Gender	Gender of respondent	1=Male, 2=Female
Education	Highest education	1=Bachelor, 2=Master, 3=PhD
Media_Use	Frequency of media use	1=Daily, 2=Weekly, 3=Monthly
Age	Respondent age in years	Numeric
3. Media Content Coding Variables
Variable	Definition	Coding
Frame_Economic	Presence of economic development frame	0=Absent, 1=Present
Frame_Sovereignty	Presence of sovereignty/security frame	0=Absent, 1=Present
Frame_Geopolitical	Presence of geopolitical rivalry frame	0=Absent, 1=Present
Sentiment	Overall tone of article	1=Negative, 2=Neutral, 3=Positive
4. Interview Coding Variables
Variable	Definition	Coding
Role	Interviewee profession	1=Journalist, 2=Policy Maker, 3=Academic
Years_Experience	Professional experience	Numeric
Key_Theme	Dominant theme	1=Development, 2=Sovereignty, 3=Security, 4=Economy
Sentiment	Interview sentiment	1=Negative, 2=Neutral, 3=Positive
5. Transformations Applied (Cleaned Dataset)
New Variable	Computation	Purpose
Econ_Index	(Econ_Benefit + Infra_Dev) / 2	Measures perceived economic development
Risk_Index	(Debt_Risk + Sovereignty) / 2	Measures perceived risk & sovereignty concern
Geo_Index	Geo_Security	Measures geopolitical/security perception
Trust_Index	Trust_China	Measures trust toward China
6. Data Cleaning Procedures
1	Missing values were checked and removed using listwise deletion.
2	All Likert items were standardized to a 1–5 scale.
3	Composite indices were computed using arithmetic means.
4	No outliers exceeded ±3 SD after screening.
